# Supplementary material
Source: bioRxiv or medRxiv preprint supplement (https://www.medrxiv.org/highwire/filestream/82773/field_highwire_adjunct_files/1/2020.05.25.20105213-2.pdf)
Supplement: Supplementary file [file 2020.05.25.20105213-2.pdf]

**Usage of data from the Couto Maia Institute**

Salvador, Bahia, Brazil, 21 May, 2020

To whom it may concern:

As director of the Couto Maia Institute (Instituto Couto Maia - ICOM), located in the city of Salvador, Bahia, I hereby confirm that ICOM has provided de-identified data on time of permanence of patients in our hospital (including in ward and in intensive care units) to the authors of the manuscript titled "Evaluating the burden of COVID-19 on hospital resources in Bahia, Brazil: A modeling-based analysis of 14.8 million individuals", with the sole purpose of using the aggregated data to calibrate the parameters of the model produced as a result of the above cited work.

The authors have compromised themselves to maintain the privacy and safety of the data as well as to use it in an ethic manner, according to local regulations on Ethics in Research (Resolution 466/2012 by the National Health Council/Conselho Nacional de Saúde – CNS).

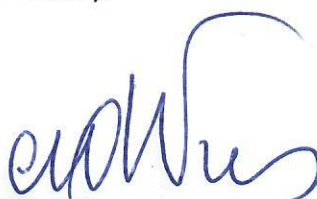

**Dr. Ceuci Nunes**

Director-general of Instituto Couto Maia  
Salvador, Bahia, Brazil
